# Supplementary material for: A Roadmap for Functional Structural Variants in the Soybean Genome
Source: PubMed Central journal article supplement (PMC4455779; doi:10.1534/g3.114.011551), 2014-05-22
Supplement: supp_g3.114.011551_011551SI.pdf [file supp_g3.114.011551_011551SI.pdf]

## A roadmap for functional structural variants in the soybean genome

Justin E. Anderson<sup>\*</sup>, Michael B. Kantar<sup>\*,§</sup>, Thomas Y. Kono<sup>\*</sup>, Fengli Fu<sup>\*</sup>, Adrian O. Stec<sup>\*</sup>, Qijian Song<sup>†</sup>, Perry B. Cregan<sup>†</sup>, James E. Specht<sup>‡</sup>, Brian W. Diers<sup>\*\*</sup>, Steven B. Cannon<sup>§§</sup>, Leah K. McHale<sup>††</sup>, and Robert M. Stupar<sup>\*,1</sup>

<sup>\*</sup> Department of Agronomy and Plant Genetics, University of Minnesota, St. Paul, MN 55108

<sup>§</sup> Department of Botany, University of British Columbia, Vancouver, BC, Canada, V6T 1Z4

<sup>†</sup> USDA, Agricultural Research Service, Soybean Genomics and Improvement Lab, Beltsville, MD 20705

<sup>‡</sup> Agronomy & Horticulture Department, University of Nebraska, Lincoln, NE 68583

<sup>\*\*</sup> Department of Crop Sciences, University of Illinois, Urbana, IL 61801

<sup>§§</sup> USDA, Agricultural Research Service, Corn Insects and Crop Genetics Research Unit, Ames, IA 50011

<sup>††</sup> Department of Horticulture and Crop Science, The Ohio State University, Columbus, OH 43210

<sup>1</sup>Author for correspondence:

Robert M. Stupar

University of Minnesota

1991 Upper Buford Circle

411 Borlaug Hall

St. Paul, MN 55108-6026

Office: 612-625-5769

Fax: 612-625-1268

Email: [rstupar@umn.edu](mailto:rstupar@umn.edu)

All comparative genomic hybridization data in this study can be found as accession number GSE56351 in the National Center for Biotechnology Information Gene Expression Omnibus (<http://www.ncbi.nlm.nih.gov/geo>). NCBI accession numbers for all resequencing data will added in the final proof.

**DOI: 10.1534/g3.114.011551**

## File S1

### Determination of CGH thresholds

Probes on the microarray were designed to bind at unique single copy sequences in the reference genome. This assumption influenced the method used to determine significant segments in the CGH data. Applying this assumption, significant DownCNV should often represent sequences that are present as a single copy in Wm82-ISU-01, but are absent in the test genotype. However, it is also possible that hybridization differences can be caused by present but highly polymorphic sequences, which may also reduce the Cy3 signal from the test genotype. True PAV segments, in contrast, should exhibit a stronger  $\log_2$  ratio reduction, as the denominator in the calculation will be expected to be nearly zero. Therefore, we applied a stringent threshold of three standard deviations to buffer against the detection of polymorphic sequences, and enrich the percentage of true PAV among the Down calls. Analysis of technical replicates of the IA3023 versus Wm82-ISU-01 comparison confirmed the highest level of repeatability using this threshold (Supplemental Table 4).

UpCNV threshold determination required a different set of assumptions. Again, segments were expected to be present as a single copy in Wm82-ISU-01. Furthermore, segments that were absent in Wm82-ISU-01 and present in the test genotype will exhibit large  $\log_2$  ratio values that will most certainly exceed the threshold. Instead, the challenge is to detect the quantitative variants that are present as a single copy in Wm82-ISU-01 but present in two or three copies in the test genotype. The *Rhg1* locus, which harbors a well-defined copy number increase across a 31.2-kb interval on chromosome 18 (Cook *et al.* 2012), was used to empirically determine an appropriate threshold to accurately call UpCNV. It was determined that a threshold of two standard deviations above the mean was capable of detecting the 3-copy haplotype of *Rhg1*, whereas a three standard deviation threshold was not. Therefore, the two standard deviation threshold was applied across the samples for the detection of UpCNV segments.

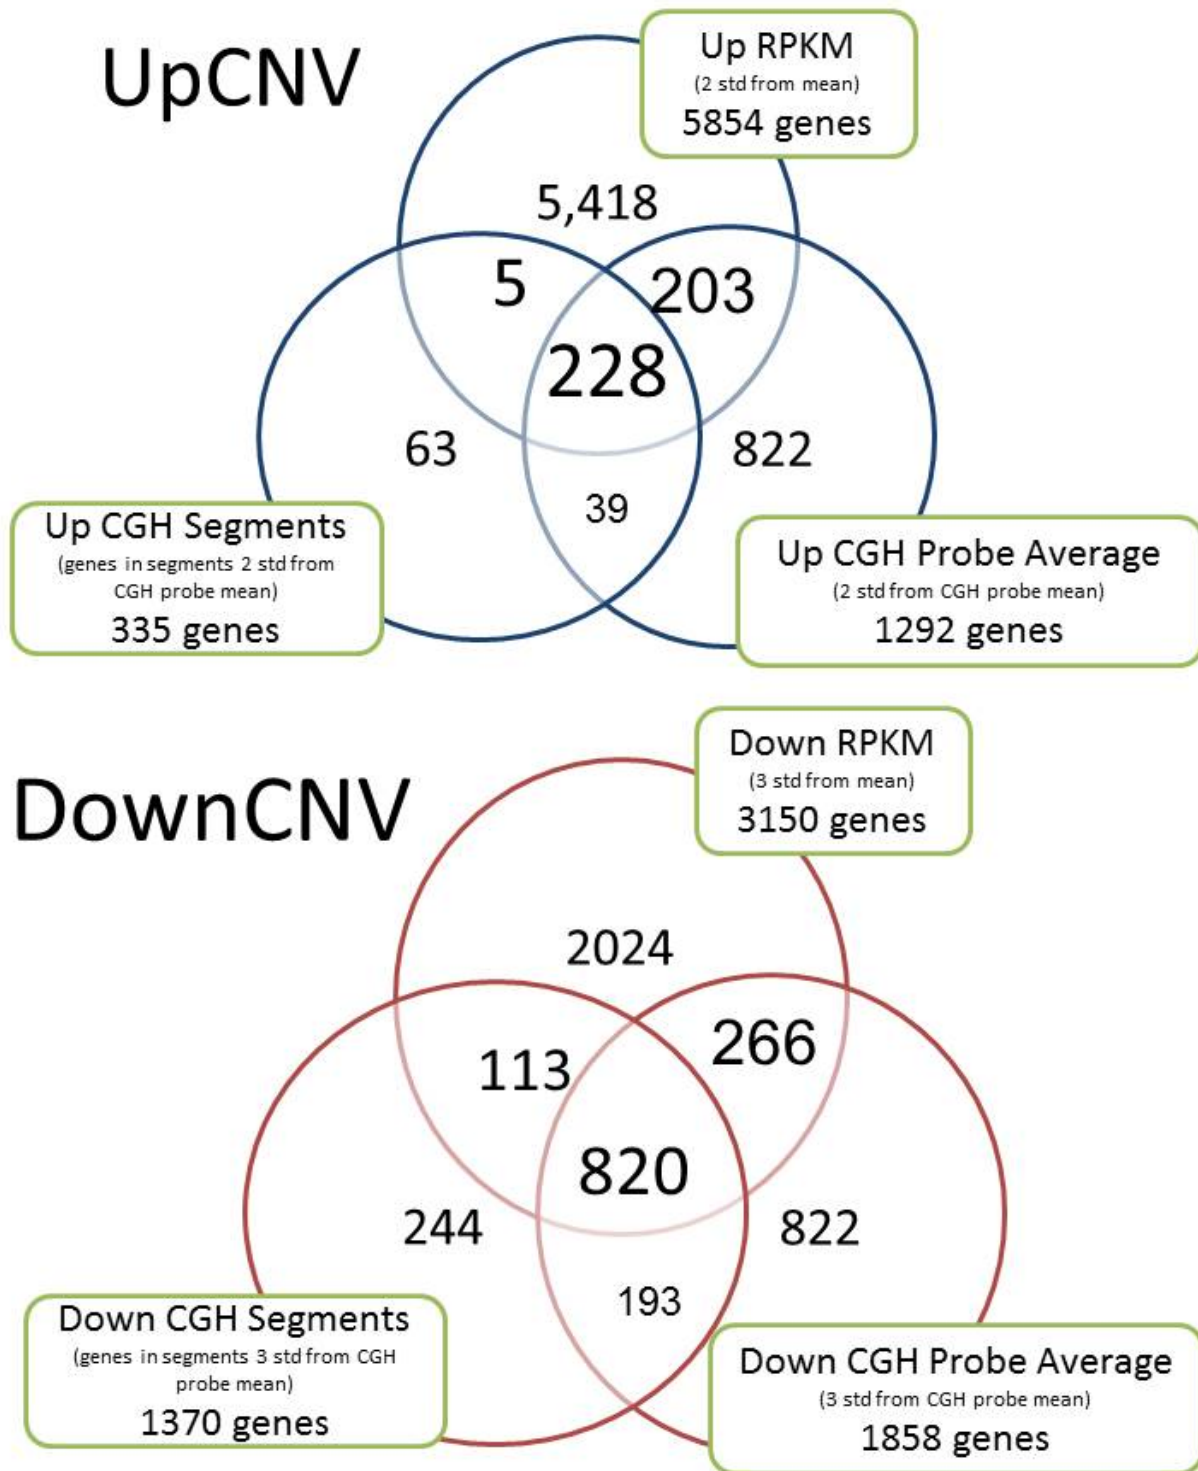

**Figure S1** Venn diagram of the number of significant copy number variant gene models identified by three different detection methods (see Experimental procedures section for descriptions of the three methods).

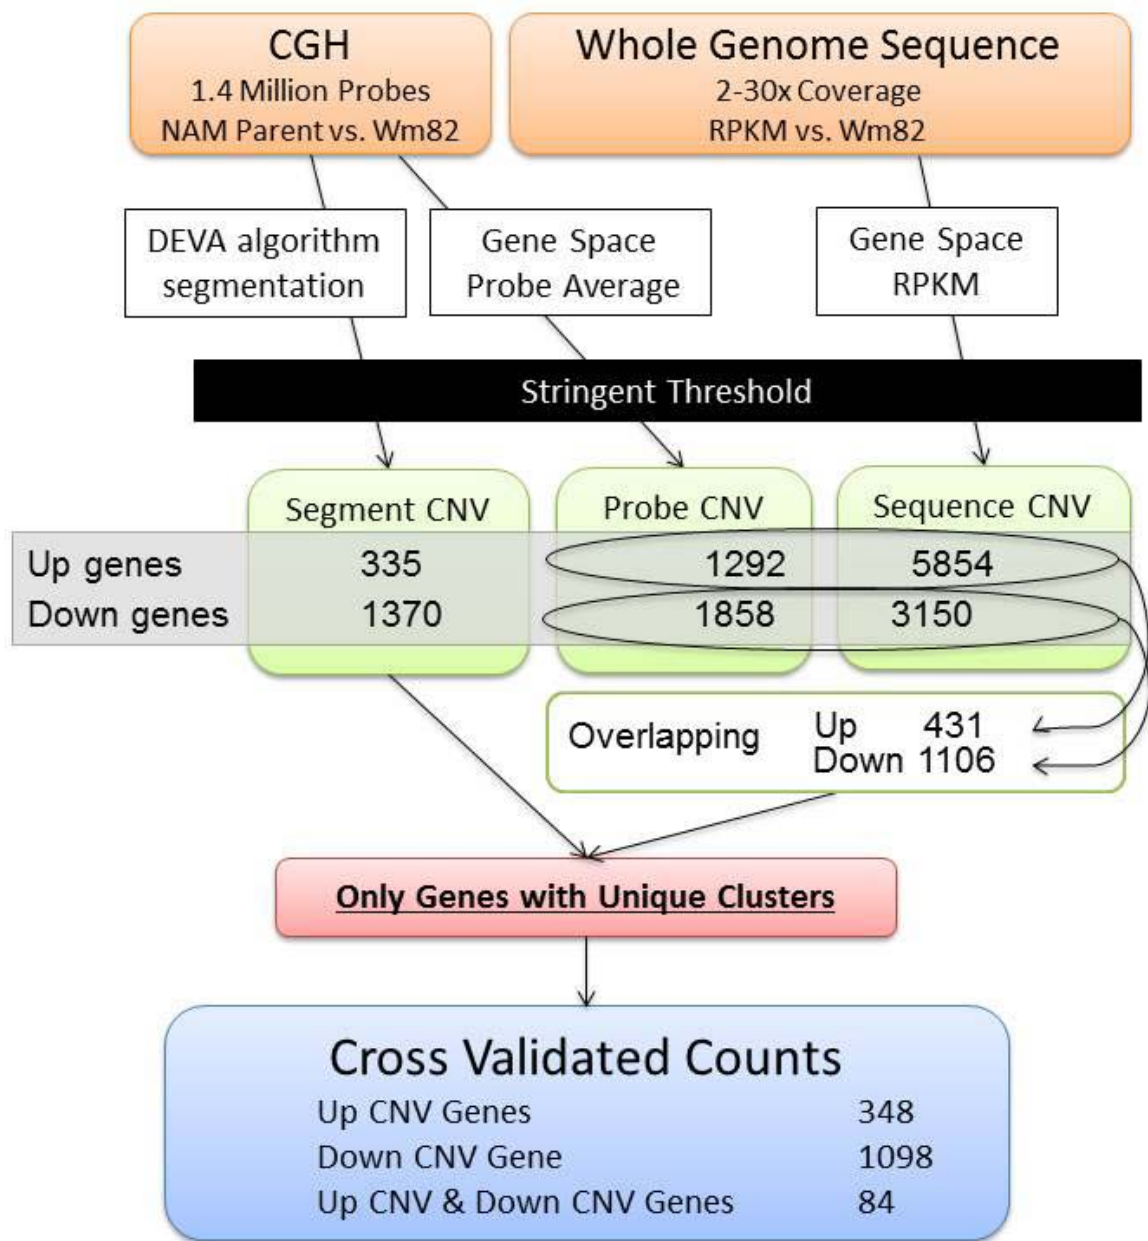

**Figure S2** Methodological flow chart of the two data types and three different methods used in this analysis.

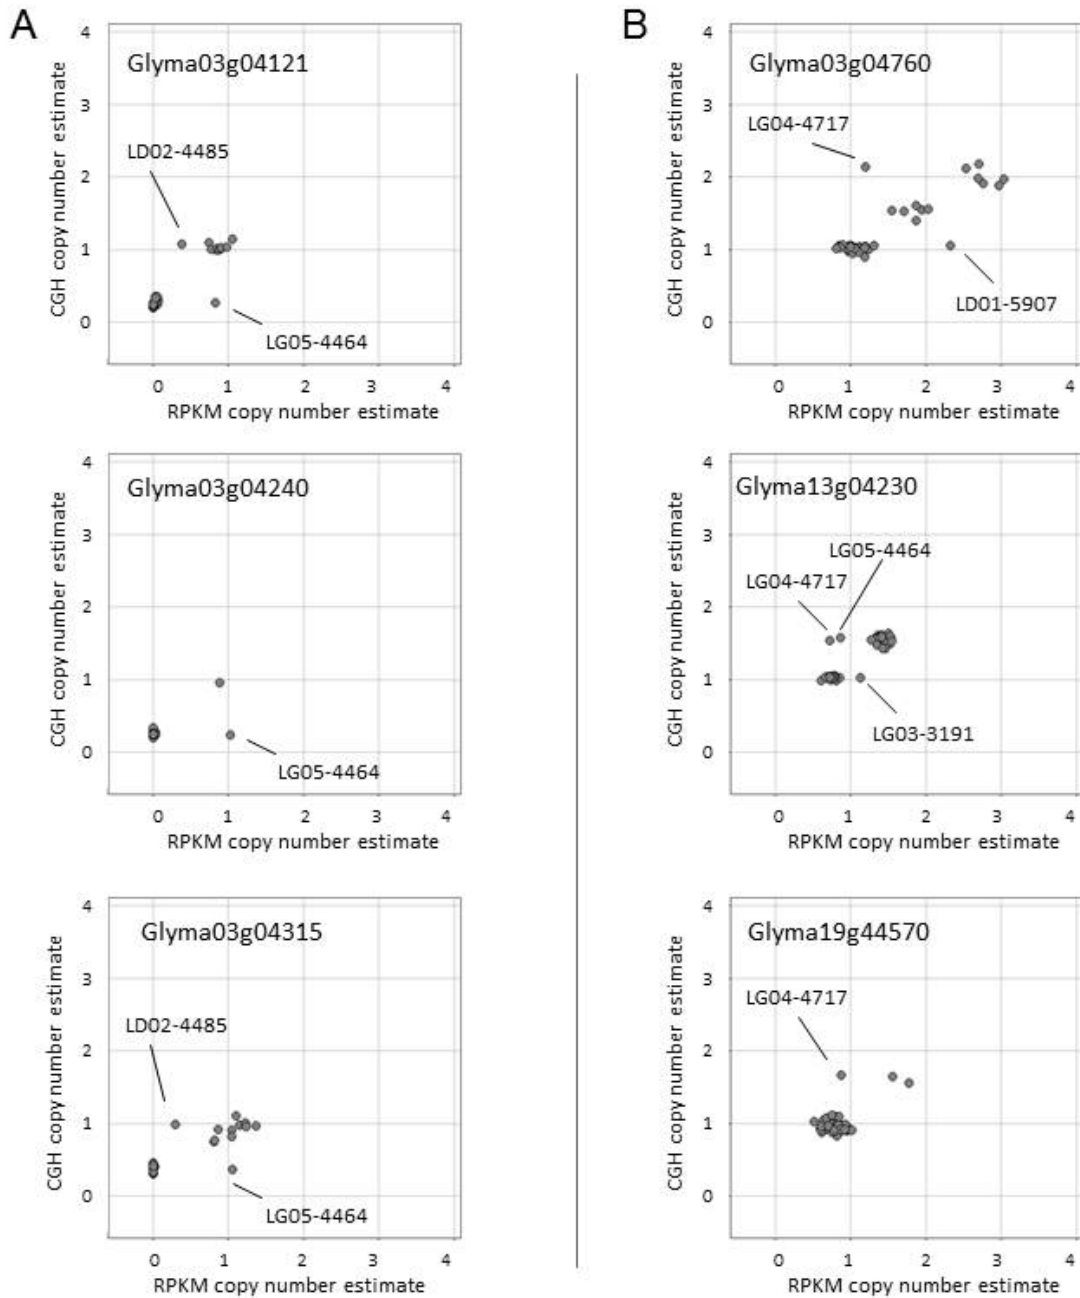

**Figure S3** Presumed intra-cultivar heterogeneity results in incongruity between resequencing (x-axis) and CGH (y-axis) copy number estimates for some gene x cultivar comparisons. A) Line LG05-4464 (parent to the NAM 29 population) appears to be present in the resequencing data but absent in the CGH data across three neighboring genes. Presumably this is caused by heterogeneity between the two different individuals of LG05-4464 that were sampled for use with the respective platforms. The three genes shown in (A) are located within a 13 gene cluster that exhibits this presence-absence pattern for this genotype. (Also note that line LD02-4485 shows the opposite profile (absent-present) for two of the three genes, presumably also caused by intra-cultivar plant heterogeneity in this region.) B) Some lines exhibited recurrent incongruities throughout different regions of the genome, such as the single copy versus UpCNV patterns shown in (B) for line LG04-4717 (parent to the NAM 26 population) across three unlinked genes.

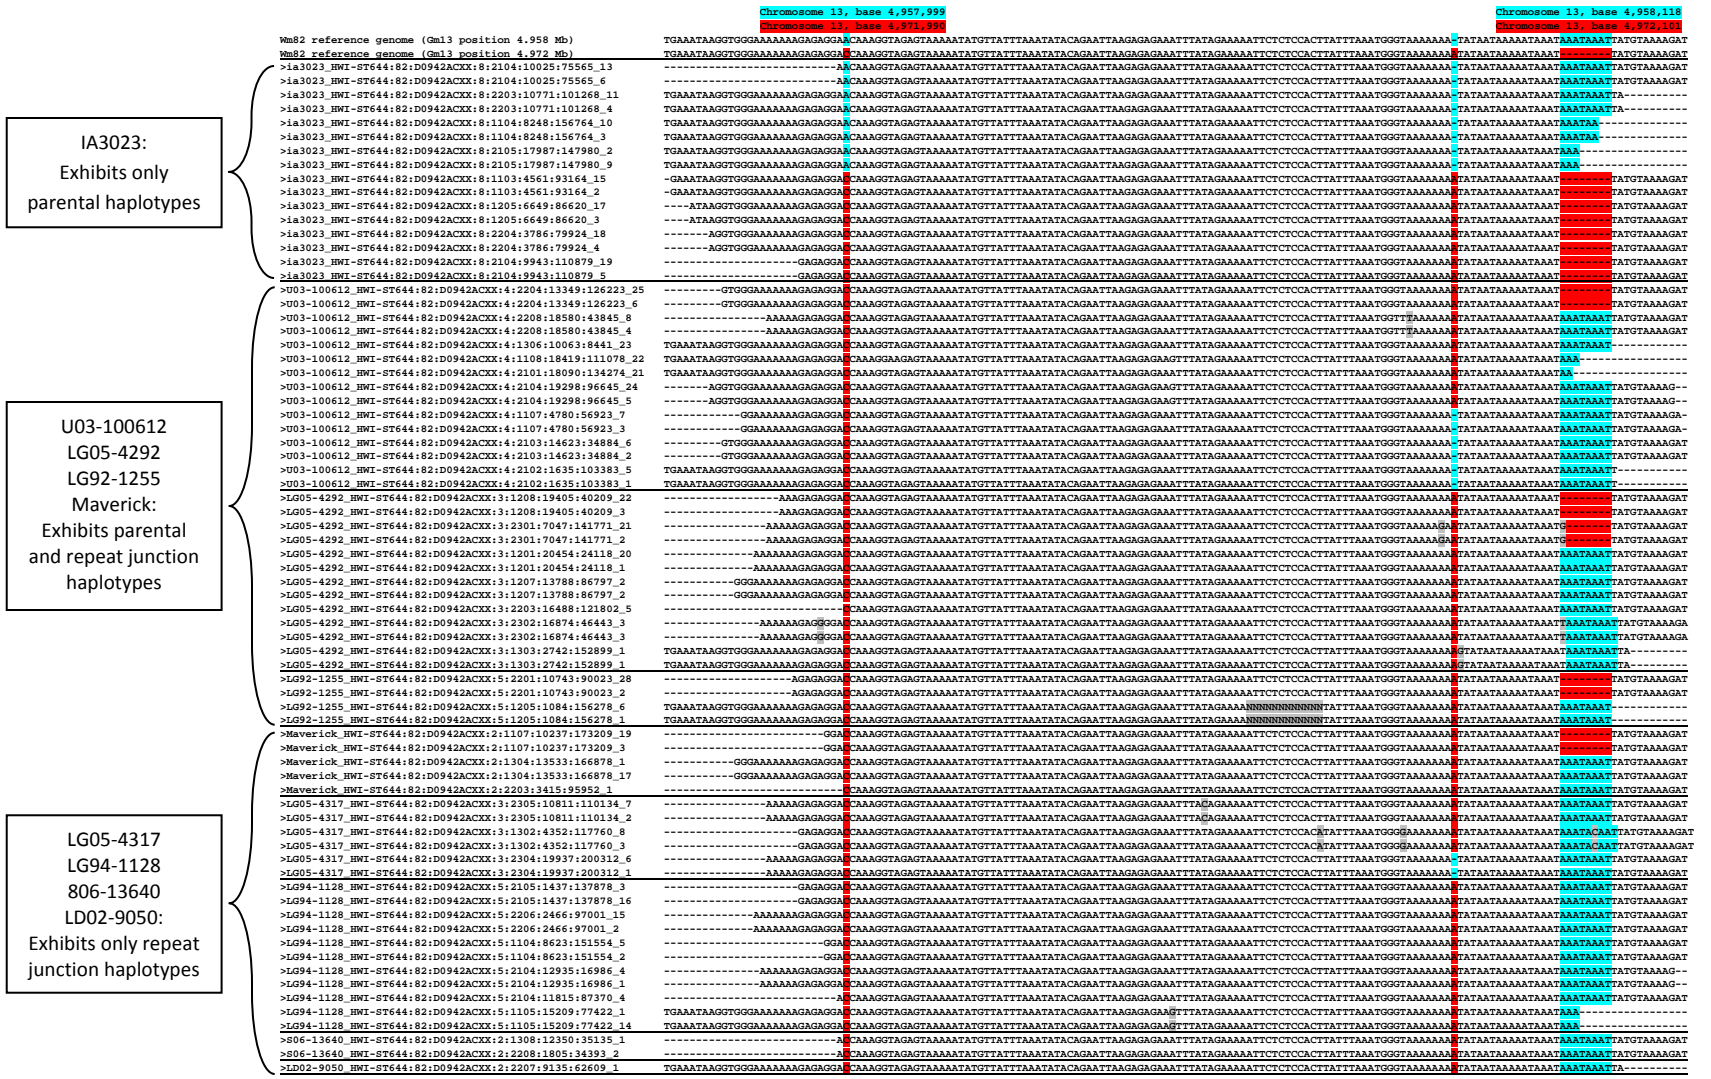

**Figure S4** Sequence-based evidence for tandem repeats at a ~14-kb interval containing Glyma13g04670. The reference genome sequence of Wm82 exhibits two highly conserved regions, positioned at approximately 4.958 MB and 4.972 MB, respectively, on chromosome 13 (positions are from the version 1 genome assembly). The top two rows of the alignment show the similarity between these regions, with polymorphic bases shaded in blue or red, respectively. Sequence reads from IA3023, which CGH and resequencing analyses indicate have only one copy of Glyma13g04670, exhibits only the parental haplotype. For eight lines that CGH and resequencing analyses indicate have more than one copy of Glyma13g04670, reads are identified that start with the 4.972 MB haplotype and end with the 4.958 MB haplotype. This suggests that at least some of the amplification of the Glyma13g04670 gene is caused by tandem repeats of this ~14-kb unit.

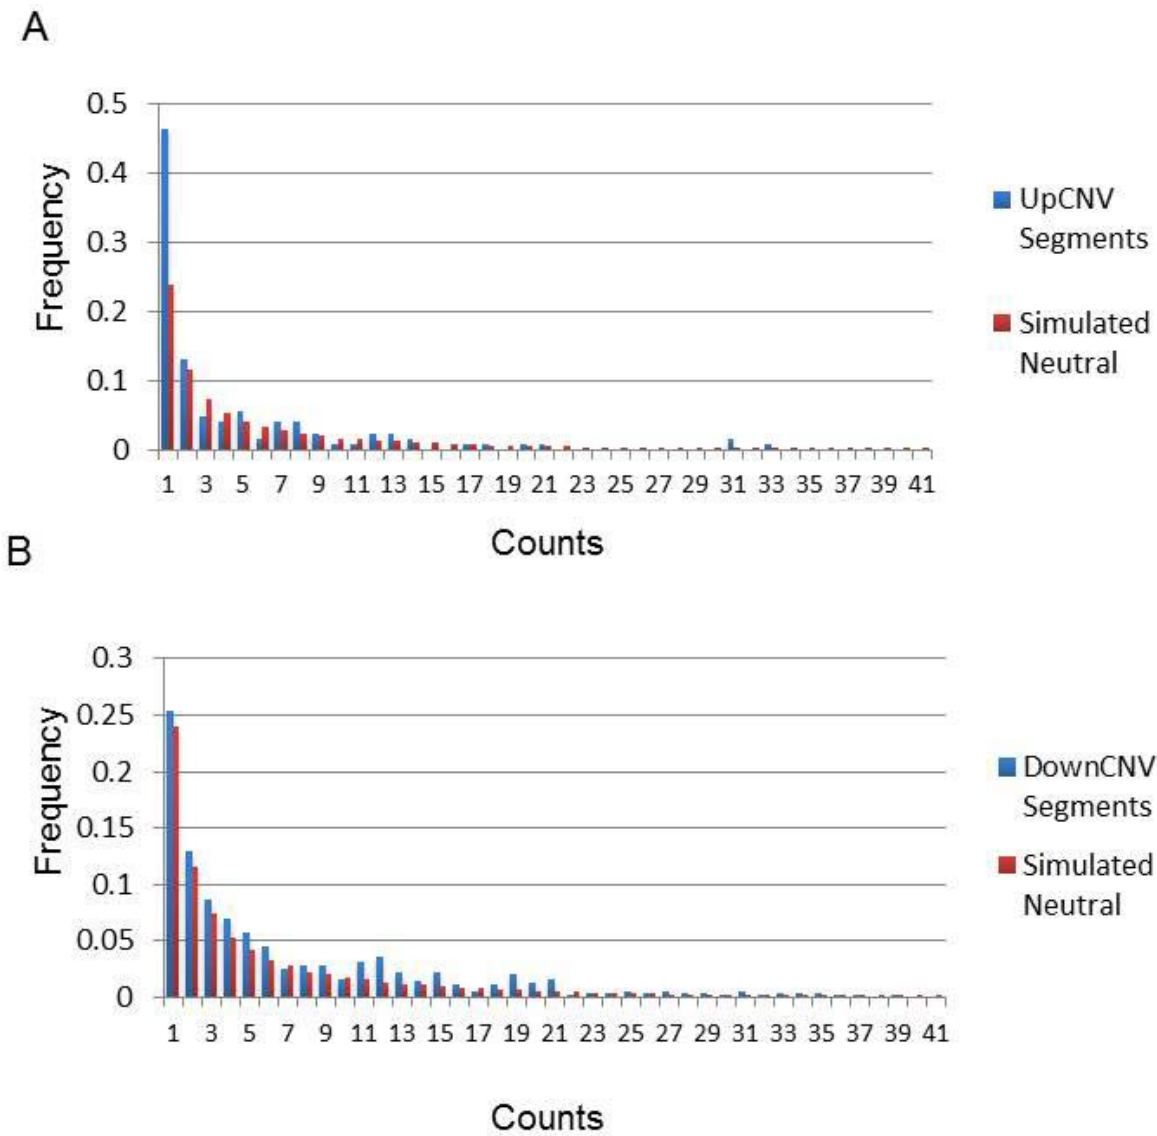

**Figure S5** Reference based site frequency spectrum for UpCNV (A) and DownCNV (B) compared with simulated neutral frequencies. The frequency of singletons in the UpCNV class clearly exceeds the simulated neutral model while DownCNV frequencies follow the neutral simulation.

**Table S1 Origin, maturity grouping and sequence depth of the soybean NAM parental genotypes assessed in this study (adapted from Stupar and Specht, 2013).**

| <b>NAM Parent</b>         | <b>Origin</b>     | <b>NAM Population</b> | <b>Maturity</b> | <b>Sequence Coverage (Mapped Reads)</b> | <b>Estimated genome coverage</b> |
|---------------------------|-------------------|-----------------------|-----------------|-----------------------------------------|----------------------------------|
| <b>IA3023</b>             | Iowa State Univ.  | Universal Parent      | III             | 300645835                               | 30.8                             |
| <b>TN05-3027</b>          | Univ. of Tenn.    | NAM 02                | V               | 56222117                                | 5.8                              |
| <b>4J105-3-4</b>          | Purdue Univ.      | NAM 03                | III             | 61126856                                | 6.3                              |
| <b>5M20-2-5-2</b>         | Purdue Univ.      | NAM 04                | III             | 41247231                                | 4.2                              |
| <b>CLOJ095-4-6</b>        | Purdue Univ.      | NAM 05                | III             | 48989486                                | 5.0                              |
| <b>CLOJ173-6-8</b>        | Purdue Univ.      | NAM 06                | III             | 32994738                                | 3.4                              |
| <b>HS6-3976</b>           | Ohio State        | NAM 08                | III             | 43816809                                | 4.5                              |
| <b>Prohio</b>             | Ohio State Univ.  | NAM 09                | III             | 50197079                                | 5.1                              |
| <b>LD00-3309</b>          | Univ. of Illinois | NAM 10                | IV              | 64726710                                | 6.6                              |
| <b>LD01-5907</b>          | Univ. of Illinois | NAM 11                | IV              | 29287082                                | 3.0                              |
| <b>LD02-4485</b>          | Univ. of Illinois | NAM 12                | III             | 38695512                                | 4.0                              |
| <b>LD02-9050</b>          | Univ. of Illinois | NAM 13                | IV              | 31217207                                | 3.2                              |
| <b>Magellan</b>           | Univ. of Missouri | NAM 14                | IV              | 19442222                                | 2.0                              |
| <b>Maverick</b>           | Univ. of Missouri | NAM 15                | IV              | 29424567                                | 3.0                              |
| <b>S06-13640</b>          | Univ. of Missouri | NAM 17                | IV              | 28792173                                | 3.0                              |
| <b>NE3001</b>             | Univ. of Nebraska | NAM 18                | III             | 43531838                                | 4.5                              |
| <b>Skylla</b>             | Mich. State Univ. | NAM 22                | III             | 34414411                                | 3.5                              |
| <b>U03-100612</b>         | Univ. of Nebraska | NAM 23                | II              | 75305879                                | 7.7                              |
| <b>LG03-2979</b>          | USDA-ARS          | NAM 24                | III             | 69257822                                | 7.1                              |
| <b>LG03-3191</b>          | USDA-ARS          | NAM 25                | IV              | 59971468                                | 6.2                              |
| <b>LG04-4717</b>          | USDA-ARS          | NAM 26                | III             | 69257822                                | 7.1                              |
| <b>LG05-4292</b>          | USDA-ARS          | NAM 27                | IV              | 56823041                                | 5.8                              |
| <b>LG05-4317</b>          | USDA-ARS          | NAM 28                | IV              | 45144887                                | 4.6                              |
| <b>LG05-4464</b>          | USDA-ARS          | NAM 29                | III             | 47400111                                | 4.9                              |
| <b>LG05-4832</b>          | USDA-ARS          | NAM 30                | III             | 47797640                                | 4.9                              |
| <b>LG90-2550</b>          | USDA-ARS          | NAM 31                | III             | 26961469                                | 2.8                              |
| <b>LG92-1255</b>          | USDA-ARS          | NAM 32                | II              | 46875996                                | 4.8                              |
| <b>LG94-1128</b>          | USDA-ARS          | NAM 33                | II              | 29801583                                | 3.1                              |
| <b>LG94-1906</b>          | USDA-ARS          | NAM 34                | II              | 41179654                                | 4.2                              |
| <b>LG97-7012</b>          | USDA-ARS          | NAM 36                | III             | 29199662                                | 3.0                              |
| <b>LG98-1605</b>          | USDA-ARS          | NAM 37                | III             | 26685064                                | 2.7                              |
| <b>LG00-3372</b>          | USDA-ARS          | NAM 38                | III             | 35159242                                | 3.6                              |
| <b>LG04-6000</b>          | USDA-ARS          | NAM 39                | IV              | 34338365                                | 3.5                              |
| <b>PI 398.881</b>         | South Korea       | NAM 40                | III             | 48432038                                | 5.0                              |
| <b>PI 427.136</b>         | South Korea       | NAM 41                | III             | 61985465                                | 6.4                              |
| <b>PI 437.169B</b>        | Russia            | NAM 42                | II              | 66818192                                | 6.9                              |
| <b>PI 507.681B</b>        |                   | NAM 46                | II              | 50931853                                | 5.2                              |
| <b>PI 518.751</b>         | Serbia            | NAM 48                | II              | 72854403                                | 7.5                              |
| <b>PI 561.370</b>         | China             | NAM 50                | III             | 67853683                                | 7.0                              |
| <b>PI 404.188A</b>        | China             | NAM 54                | II              | 57653141                                | 5.9                              |
| <b>PI 574.486</b>         | China             | NAM 64                | II              | 36042594                                | 3.7                              |
| <b>Williams 82-ISU-01</b> |                   | Reference Genome      | III             | 133013600                               | 13.6                             |



**Table S2 Repeatability of technical replications at variable thresholds.**

| Threshold                    | Threshold log <sub>2</sub><br>ratio mean |        | Genes in Significant Down Segments |       |                          |               | All probes in Significant Segments |       |                           |               |
|------------------------------|------------------------------------------|--------|------------------------------------|-------|--------------------------|---------------|------------------------------------|-------|---------------------------|---------------|
|                              |                                          |        | Genes Found Significant            |       | Significant Genes Shared | Repeatability | Probes found significant           |       | Significant Probes Shared | Repeatability |
|                              | Rep 1                                    | Rep 2  | Rep 1                              | Rep 2 |                          |               | Rep 1                              | Rep 2 |                           |               |
| <b>90%</b>                   | -0.196                                   | -0.198 | 1496                               | 1203  | 991                      | 0.58          | 62268                              | 51999 | 44660                     | 0.64          |
| <b>95%</b>                   | -0.253                                   | -0.253 | 443                                | 443   | 370                      | 0.72          | 40382                              | 34820 | 29702                     | 0.65          |
| <b>99%</b>                   | -0.433                                   | -0.422 | 952                                | 798   | 665                      | 0.61          | 19715                              | 19382 | 16378                     | 0.72          |
| <b>2 standard deviations</b> | -0.615                                   | -0.575 | 341                                | 365   | 291                      | 0.70          | 14477                              | 15485 | 12293                     | 0.70          |
| <b>3 standard deviations</b> | -0.922                                   | -0.863 | 204                                | 222   | 184                      | 0.76          | 8850                               | 8959  | 7638                      | 0.75          |
| <b>4 standard deviations</b> | -1.229                                   | -1.151 | 164                                | 128   | 111                      | 0.61          | 6126                               | 5483  | 4746                      | 0.69          |

**Tables S3-S6**

Available for download as Excel files at <http://www.g3journal.org/lookup/suppl/doi:10.1534/g3.114.011551/-/DC1>

**Table S3** Segmentation and Frequency of Up rSFS.

**Table S4** Segmentation and Frequency of Down rSFS.

**Table S5** Genes present in Cross-validated classes.

**Table S6** Paralogous gene pairs in the soybean genome derived from ancient whole-genome duplication(s).
