# Supplementary material for: A Roadmap for Functional Structural Variants in the Soybean Genome
Source: PubMed Central journal article supplement (PMC4455779; doi:10.1534/g3.114.011551), 2014-05-22
Supplement: supp_g3.114.011551_FigureS1.pdf [file supp_g3.114.011551_FigureS1.pdf]

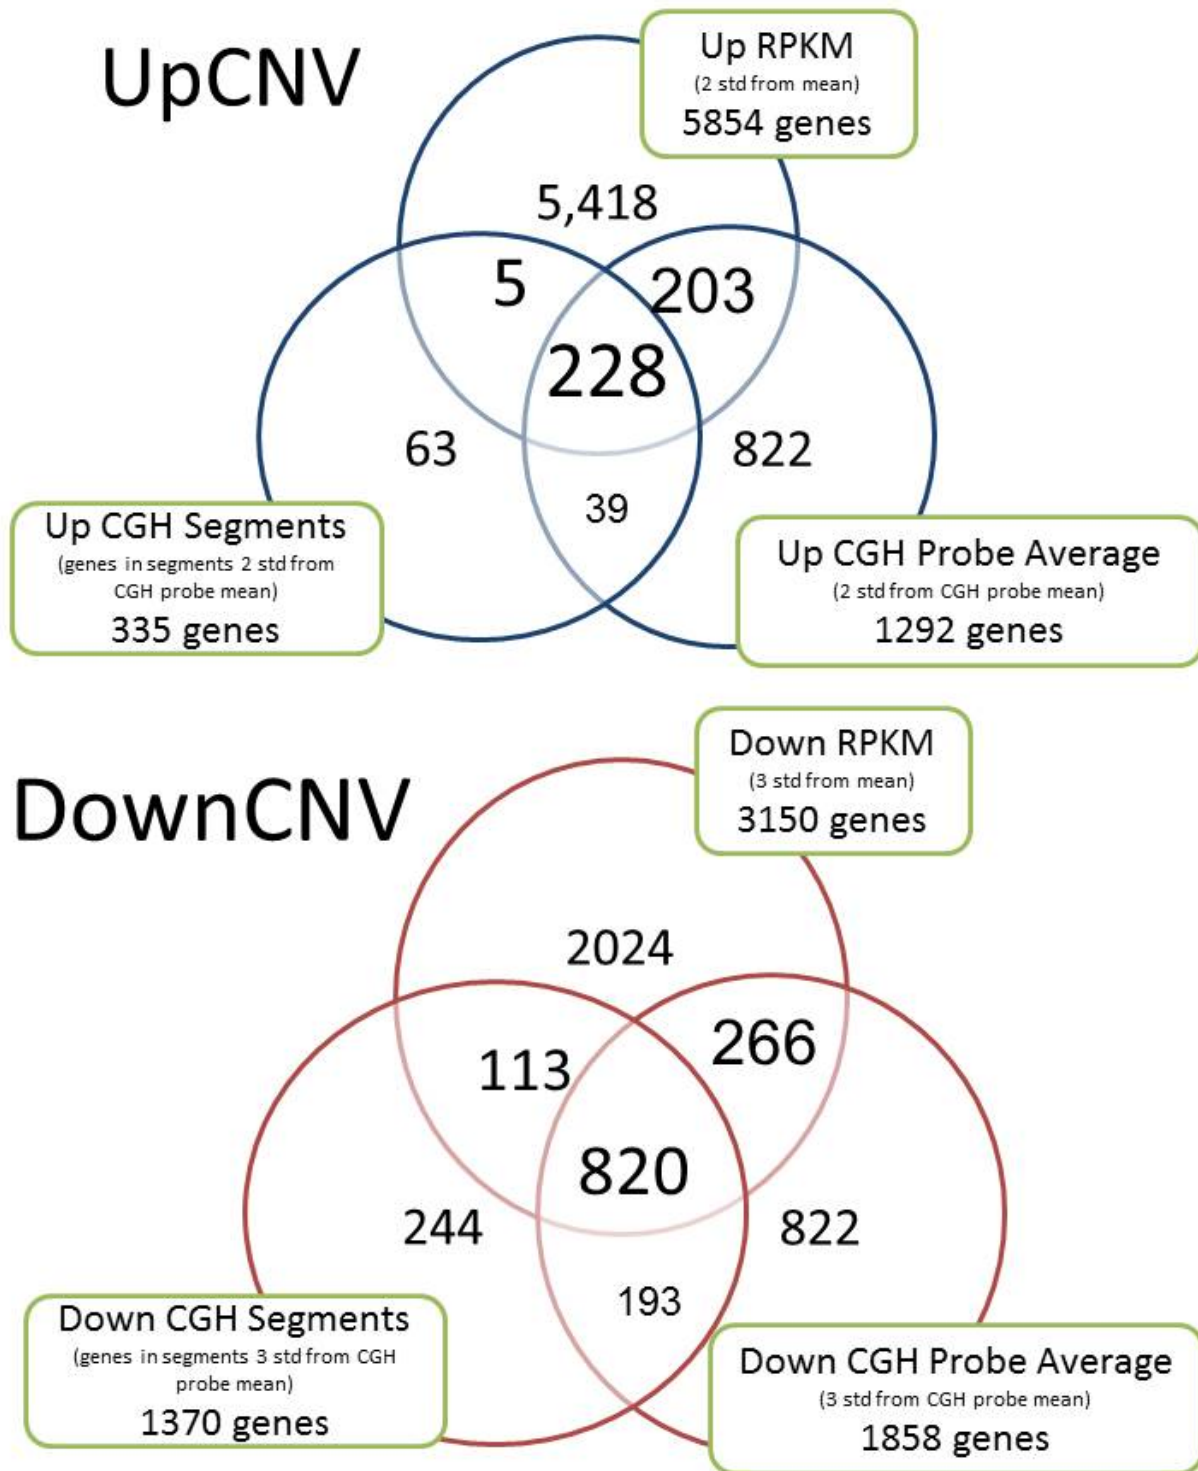

**Figure S1** Venn diagram of the number of significant copy number variant gene models identified by three different detection methods (see Experimental procedures section for descriptions of the three methods).
