# Supplementary material for: A Roadmap for Functional Structural Variants in the Soybean Genome
Source: PubMed Central journal article supplement (PMC4455779; doi:10.1534/g3.114.011551), 2014-05-22
Supplement: supp_g3.114.011551_FigureS2.pdf [file supp_g3.114.011551_FigureS2.pdf]

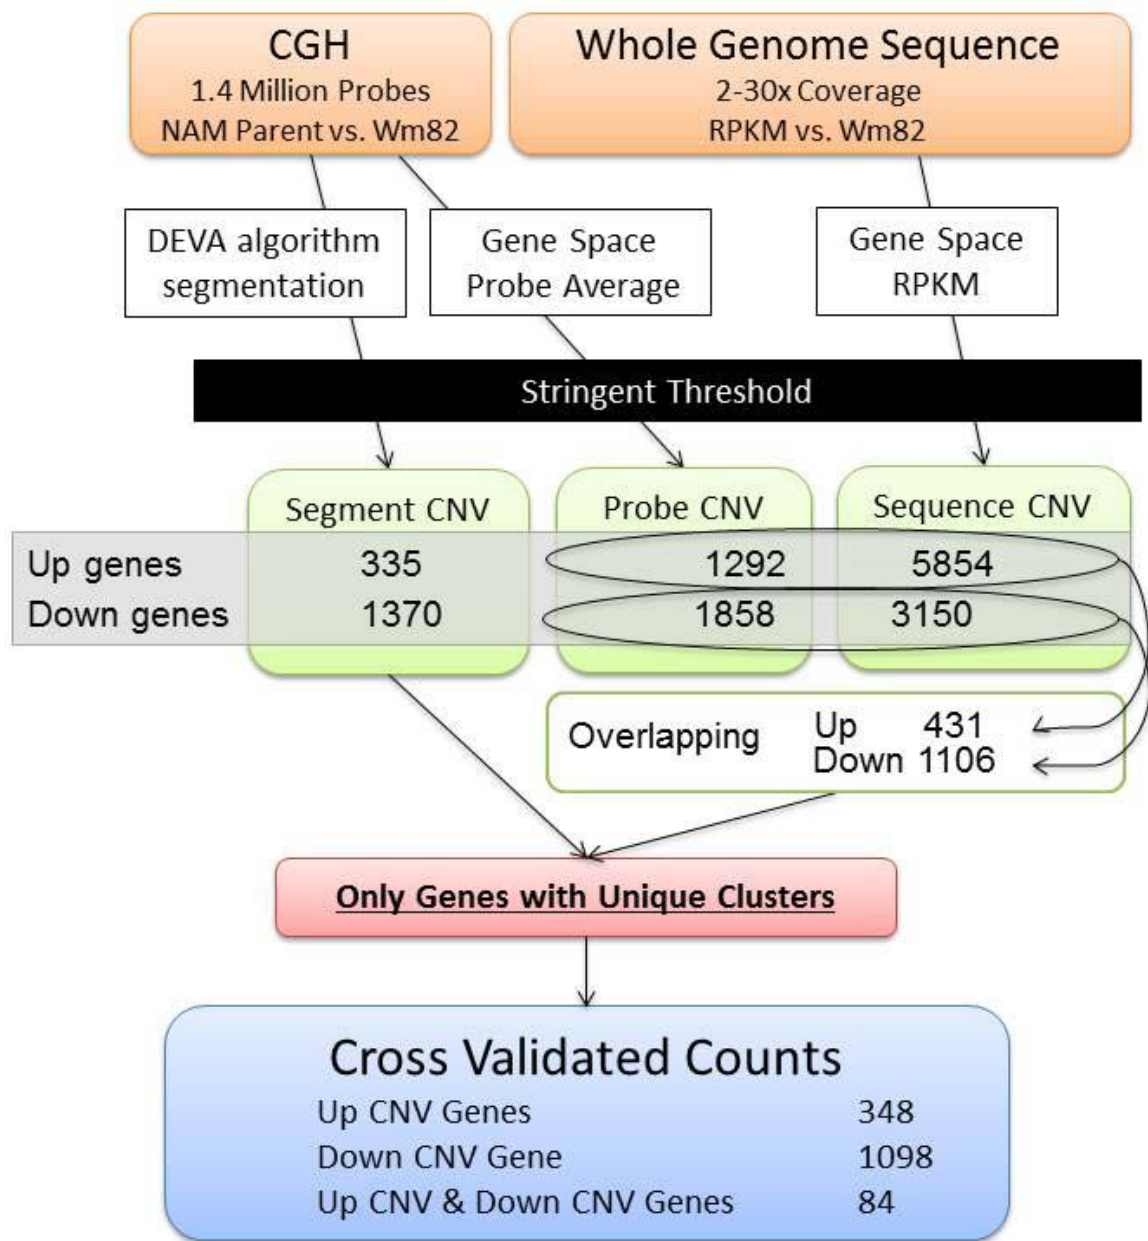

**Figure S2** Methodological flow chart of the two data types and three different methods used in this analysis.
