# Supplementary material for: A Roadmap for Functional Structural Variants in the Soybean Genome
Source: PubMed Central journal article supplement (PMC4455779; doi:10.1534/g3.114.011551), 2014-05-22
Supplement: supp_g3.114.011551_TableS1.pdf [file supp_g3.114.011551_TableS1.pdf]

**Table S1 Origin, maturity grouping and sequence depth of the soybean NAM parental genotypes assessed in this study (adapted from Stupar and Specht, 2013).**

| <b>NAM Parent</b>         | <b>Origin</b>     | <b>NAM Population</b> | <b>Maturity</b> | <b>Sequence Coverage (Mapped Reads)</b> | <b>Estimated genome coverage</b> |
|---------------------------|-------------------|-----------------------|-----------------|-----------------------------------------|----------------------------------|
| <b>IA3023</b>             | Iowa State Univ.  | Universal Parent      | III             | 300645835                               | 30.8                             |
| <b>TN05-3027</b>          | Univ. of Tenn.    | NAM 02                | V               | 56222117                                | 5.8                              |
| <b>4J105-3-4</b>          | Purdue Univ.      | NAM 03                | III             | 61126856                                | 6.3                              |
| <b>5M20-2-5-2</b>         | Purdue Univ.      | NAM 04                | III             | 41247231                                | 4.2                              |
| <b>CLOJ095-4-6</b>        | Purdue Univ.      | NAM 05                | III             | 48989486                                | 5.0                              |
| <b>CLOJ173-6-8</b>        | Purdue Univ.      | NAM 06                | III             | 32994738                                | 3.4                              |
| <b>HS6-3976</b>           | Ohio State        | NAM 08                | III             | 43816809                                | 4.5                              |
| <b>Prohio</b>             | Ohio State Univ.  | NAM 09                | III             | 50197079                                | 5.1                              |
| <b>LD00-3309</b>          | Univ. of Illinois | NAM 10                | IV              | 64726710                                | 6.6                              |
| <b>LD01-5907</b>          | Univ. of Illinois | NAM 11                | IV              | 29287082                                | 3.0                              |
| <b>LD02-4485</b>          | Univ. of Illinois | NAM 12                | III             | 38695512                                | 4.0                              |
| <b>LD02-9050</b>          | Univ. of Illinois | NAM 13                | IV              | 31217207                                | 3.2                              |
| <b>Magellan</b>           | Univ. of Missouri | NAM 14                | IV              | 19442222                                | 2.0                              |
| <b>Maverick</b>           | Univ. of Missouri | NAM 15                | IV              | 29424567                                | 3.0                              |
| <b>S06-13640</b>          | Univ. of Missouri | NAM 17                | IV              | 28792173                                | 3.0                              |
| <b>NE3001</b>             | Univ. of Nebraska | NAM 18                | III             | 43531838                                | 4.5                              |
| <b>Skylla</b>             | Mich. State Univ. | NAM 22                | III             | 34414411                                | 3.5                              |
| <b>U03-100612</b>         | Univ. of Nebraska | NAM 23                | II              | 75305879                                | 7.7                              |
| <b>LG03-2979</b>          | USDA-ARS          | NAM 24                | III             | 69257822                                | 7.1                              |
| <b>LG03-3191</b>          | USDA-ARS          | NAM 25                | IV              | 59971468                                | 6.2                              |
| <b>LG04-4717</b>          | USDA-ARS          | NAM 26                | III             | 69257822                                | 7.1                              |
| <b>LG05-4292</b>          | USDA-ARS          | NAM 27                | IV              | 56823041                                | 5.8                              |
| <b>LG05-4317</b>          | USDA-ARS          | NAM 28                | IV              | 45144887                                | 4.6                              |
| <b>LG05-4464</b>          | USDA-ARS          | NAM 29                | III             | 47400111                                | 4.9                              |
| <b>LG05-4832</b>          | USDA-ARS          | NAM 30                | III             | 47797640                                | 4.9                              |
| <b>LG90-2550</b>          | USDA-ARS          | NAM 31                | III             | 26961469                                | 2.8                              |
| <b>LG92-1255</b>          | USDA-ARS          | NAM 32                | II              | 46875996                                | 4.8                              |
| <b>LG94-1128</b>          | USDA-ARS          | NAM 33                | II              | 29801583                                | 3.1                              |
| <b>LG94-1906</b>          | USDA-ARS          | NAM 34                | II              | 41179654                                | 4.2                              |
| <b>LG97-7012</b>          | USDA-ARS          | NAM 36                | III             | 29199662                                | 3.0                              |
| <b>LG98-1605</b>          | USDA-ARS          | NAM 37                | III             | 26685064                                | 2.7                              |
| <b>LG00-3372</b>          | USDA-ARS          | NAM 38                | III             | 35159242                                | 3.6                              |
| <b>LG04-6000</b>          | USDA-ARS          | NAM 39                | IV              | 34338365                                | 3.5                              |
| <b>PI 398.881</b>         | South Korea       | NAM 40                | III             | 48432038                                | 5.0                              |
| <b>PI 427.136</b>         | South Korea       | NAM 41                | III             | 61985465                                | 6.4                              |
| <b>PI 437.169B</b>        | Russia            | NAM 42                | II              | 66818192                                | 6.9                              |
| <b>PI 507.681B</b>        |                   | NAM 46                | II              | 50931853                                | 5.2                              |
| <b>PI 518.751</b>         | Serbia            | NAM 48                | II              | 72854403                                | 7.5                              |
| <b>PI 561.370</b>         | China             | NAM 50                | III             | 67853683                                | 7.0                              |
| <b>PI 404.188A</b>        | China             | NAM 54                | II              | 57653141                                | 5.9                              |
| <b>PI 574.486</b>         | China             | NAM 64                | II              | 36042594                                | 3.7                              |
| <b>Williams 82-ISU-01</b> |                   | Reference Genome      | III             | 133013600                               | 13.6                             |
