# Supplementary material for: A Roadmap for Functional Structural Variants in the Soybean Genome
Source: PubMed Central journal article supplement (PMC4455779; doi:10.1534/g3.114.011551), 2014-05-22
Supplement: supp_g3.114.011551_TableS2.pdf [file supp_g3.114.011551_TableS2.pdf]

**Table S2 Repeatability of technical replications at variable thresholds.**

| Threshold                    | Threshold log <sub>2</sub><br>ratio mean |        | Genes in Significant Down Segments |       |                          |               | All probes in Significant Segments |       |                           |               |
|------------------------------|------------------------------------------|--------|------------------------------------|-------|--------------------------|---------------|------------------------------------|-------|---------------------------|---------------|
|                              |                                          |        | Genes Found Significant            |       | Significant Genes Shared | Repeatability | Probes found significant           |       | Significant Probes Shared | Repeatability |
|                              | Rep 1                                    | Rep 2  | Rep 1                              | Rep 2 |                          |               | Rep 1                              | Rep 2 |                           |               |
| <b>90%</b>                   | -0.196                                   | -0.198 | 1496                               | 1203  | 991                      | 0.58          | 62268                              | 51999 | 44660                     | 0.64          |
| <b>95%</b>                   | -0.253                                   | -0.253 | 443                                | 443   | 370                      | 0.72          | 40382                              | 34820 | 29702                     | 0.65          |
| <b>99%</b>                   | -0.433                                   | -0.422 | 952                                | 798   | 665                      | 0.61          | 19715                              | 19382 | 16378                     | 0.72          |
| <b>2 standard deviations</b> | -0.615                                   | -0.575 | 341                                | 365   | 291                      | 0.70          | 14477                              | 15485 | 12293                     | 0.70          |
| <b>3 standard deviations</b> | -0.922                                   | -0.863 | 204                                | 222   | 184                      | 0.76          | 8850                               | 8959  | 7638                      | 0.75          |
| <b>4 standard deviations</b> | -1.229                                   | -1.151 | 164                                | 128   | 111                      | 0.61          | 6126                               | 5483  | 4746                      | 0.69          |
